# Supplementary material
Source: publisher figshare collection journal article supplement (https://karger.figshare.com/ndownloader/files/13818365)
Supplement: Supplementary file 1 [file 13818365]

Title page:

**Identification of A Ring-Hydroxylating Dioxygenases for Anthracene and** **Benz[a]anthracene Oxidization in *Rhodococcus* sp*.* P14**

Tao Peng1＃, An Luo1＃, Jie Kan1, Lei Liang1, Tongwang Huang1, Zhong Hu1*

1Department of Biology, Shantou University, Shantou, Guangdong 515063, China

＃: There authors contribute equally to this paper

*: corresponding author: Department of Biology, Shantou University, Shantou, Guangdong 515063, China. Email: hzh@stu.edu.cn (Z. Hu)

This Supplementary Material contains:

Supplementary Method

Supplementary Table 1

Supplementary Figure 1-3

**Supplement Method**

*Western blot* analysis

For Western blot experiments，*E. coli* cultures were induced by IPTG as described above. The 12%-SDS gel was used to separate proteins and electro-blotted to a 0.45 μm polyvinylidene fluoride (PVDF) membrane (Merck, Germany). The membrane was blocked at room temperature with 5% skimmed milk powder for 1 h. After blocking, the membrane was washed with 20 mM Tris base solution with 0.1% Tween-20 inside, then the membrane was incubated with 0.1% His-Tag or S-Tag for 2 hours at room temperature. After washing with Tris base-Tween 20 solution again, conjugated HRP-labeled goat anti-rabbit IgG or labeled goat anti-rat IgG was added to the membrane and incubated for 2 hours. After the last washing step, 0.03% (w/v) 3,3′-diaminobenzidine (DAB) was added to visualize the protein bands.

**Supplement Table**

**Table S1** Primers used in this study

| Primer | Sequence (5’-3’) |
| --- | --- |
| *baaA-s* | CCGGAATTCGATGACCGAGACCCTGGACCAC |
| *baaA-a* | CCCAAGCTTTCAGCGCTCGTTCGCGGCGGT |
| *baaB-s* | CCGGAATTCGATGACCACCGCAATGGAATTGAC |
| *baaB-a* | CCCAAGCTTTCAGACGACGTAGACGTCCACGAT |
| *baaC-s* | GGGAATTCCATATGGTGGGAAATCTGACCTCGTCG |
| *baaC-a* | ATAGATATCTACGCCGCCGAGACGAACTTCTCC |
| *baaD-s* | GGGAATTCCATATGGTGAGTTTCCAGGTGGCATTG |
| *baaD-a* | ATAGATATCCACGCGATCTCCGCCTTCGCGGAG |
| *16S-RT-s* | GCACAAGCGGTGGAGCAT |
| *16S-RT-a* | AACCCAACATCTCACGACACGA |
| *baaA-RT-s* | TTCGAGCTGGAGATGAAG |
| *baaA-RT-a* | ATGTAGGTGGTGAAGTAGT |

>*baaA*

ATGACCGAGACCCTGGACCACGTGCGCGCCGAACTCGACGGCGCCCTCGTCGAAGACGCGGAGACCGGCCGATACCAGGTGCGCCGCAACATCTTCACCGACGAAGAGATCTTCGAGCTGGAGATGAAGCACATCTTCGAAGGCAACTGGGTCTACCTCGCGCACGAGAGCCAGATCCCGAACAACGGGGACTACTTCACCACCTACATCGGCCGCCAGCCCATCGTGATCAGCCGCGACAAGGAGGGCGAGCTGCACTGCCTGATCAACGCGTGCAGCCACCGCGGCGCCATGCTGTGCCGCCGCAAGACCGACAACCGCACGACGTTCACGTGCCCCTTCCACGGCTGGACCTTCCGCAACAACGGCAAGCTGCTCAAGGTCAAGGACCCGCGCGACGCCGGCTACCCGGAACAGTTCAACAAGGACGGCAGCCACGACCTGACCAAGGTCGCCCGCTTCGAAAGCTACCGCGGGTTCCTCTTCGGCAGCCTGAACGCCGACGTCAAGTCGCTCGAGGAACACCTCGGCGACACCACCAAGATCATCGACATGATCGTCGACCAGTCTCCCGAGGGCCTCGAGGTGCTGCGCGGCTCCTCGACCTACACCTACGACGGGAACTGGAAGCTGCAGGCCGAGAACGGCGCCGACGGCTACCACGTGTCGGCCACGCACTGGAACTACGCGGCCACCACCGCGCGCCGCACCGCCGGCGAGTCGGCCAACGAGACCAAGGCGATGGACGCCGGCACCTGGGGCAAGCAGGGCGGCGGCTACCACTCGTTCGACAACGGCCACCTGCTGCTGTGGATGTGGTGGGGCAACCCGCAGGACCGTCCGCTCTACCCGCGCCGGGCGGAACTCGCCGCCGAGTTCGGCGAGAAGAAGGCCGAGTTCATGGTCGGGGCGTCGCGCAACCTGTGCCTGTACCCGAACGTGTACCTGATGGACCAGTTCTCGTCTCAGATCCGGCATTTCCGGCCGATCTCGGTGGACAAGACCGAGGTCACCATCTACTGCATCGCCCCGAAGGGGGAGAGCGCCGAGTCCCGCGCCAACCGCATCCGGCAGTACGAGGACTTCTTCAACGCCACCGGTATGGCCACCCCGGACGATCTCGAGGAGTTCCGGTCCTGCCAGAAGACCTACCTGGCCACCGCCGCACCGTGGAACGACCTGAGCCGCGGCGCGACCCACCAGCTGAACGGACCGGACCAGGTCGCGCTCGACCTCGGCATGAAGAACGTGCTGTCGAGCGGGGTGAAGACCGAGGACGAGGGCCTGTACCCGATCCAGCACGGCTTCTGGCTCGACAGTATGCGCAAGGCCGTCGCGGCCGAGGCCGCCGCCGAGTCCACCGCCGCGAACGAGCGCTGA

>*baaB*

ATGACCACCGCAATGGAATTGACCCAGAACGACATCGAGCAGTTCCTCTACCGCGAGGCCCGTCTCCTCGACGACCGCGAGTTCGAGAAGTGGCTCGAGTGCTACCACCCGCAGGCCGAGTACTGGATGCCGGCGTGGGACGACAACGGTGAGCTCACCACGGACCCGCAGCGCGAGATCTCGCTCATCTACTACCCCAACCGGGGCGGCCTCGAGGACCGGGTGTTCCGCATCCGCACCGACCGCTCGTCCGCGACGTCGCTGCCCGAACCGCGCACCGGCCACAACATCACCAACGTCGAGATCCTCGAGCGCCGCGGCACGGAGATCGACCTGCGCCACAACTGGTTCTCGCTGTACTACCGGTACAACACCACCGACACCTATTTCGGCACGACGTTCGTCACGCTCGACGTCTCGGGCGCCCAGCCGGTGATCAAGAAGAAGAAGATCGTGCTCAAGAACGACTACATCCACCACATCGTGGACGTCTACGTCGTCTGA

>*baaC*

GTGAGTTTCCAGGTGGCATTGAGCTTCGAGGACGGGGTGACCCGCTTCGTCAAGTGCGGACCGAACGAGACGGTCGCCGACGCGTCGTACAAGGCGCGCATCAACATTCCTCTCGACTGCCGTGACGGCGCGTGCGGTACCTGCAAGGCGCTGTGCGAGTCCGGCACCTACGACGGCGGCGACTACATCGAGGAGGCGCTGACCGACGACGAGGCCGAGCAGGGTTATTGCTTGCCGTGCCAGATGACGCCCGAGTCGGACCTCGTGCTGCAGATCGCCACGACTTCCGACGTCGCGAAGACCGCGGCGGCGACCTACACGGCGACGATCACCGACATCCGCCGCTTCTCCGACAGCACCGTCGGGTTCACCGTCGAGATCCCGAACCGCGACGAGCTGGTGTTCCTGCCGGGCCAGTACGTCAACATCACAGTGCCCGGCACCGGGCAGACCCGGTCGTACTCGTTCAGCACCGGCCCCAACGATCCGCACCTGTCGTTCCTGGTGAAGATCACCGAGGGTGGCCTGATGTCGGAGTACCTGCGCGACCGCGCCCAGGTCGGCGACACGCTGGAGTTCACCGGTCCGTTCGGCAGCTTCTTCCTGCGCGAGCGCACGCGGCCCGCGCTGCTGCTCGCCGGCGGCACCGGGCTCGCCCCGATCCTGGCCATCCTCGCCAGGATGCAGGAGCAGGACAGCGGCCTGCCGGTGCATCTGATCTACGGCGCCTCGTTCGATCAGGACGTCGTCGAACTCGACAAGCTCGAGGAGTACACGCGGTCGCTGCCGAACTTCACGTTCGAGTACTGCGTCTCCGACCCGGCCACTTCGGCCGCGAACAAGGGTTACGTCACGTCGCTGTTCGAGCCGAAGCACCTGAACGACGGCGATGTCGACGTGTACCTGTGCGGGCCGCCGCCGATGGTCGAGGCGGTGCGCACGCACTTCGACAGCGAGGGTCTCACGCCCGCCAACTTCTTCTTCGAGAAGTTCAACAACTCCGCGACGGGCGCCGCCGGGCAGGCACCCGAGCCCACCGAGGCGGAGCGCATCGCGGCCGAGAAGGCCGCCGCCGAAACCGGACTGCCGGTCTCGCTCGGGCCCGCGAACCCCGTGGCACAGGACAACTACGAGATCGGCGAGGAGCACCCGCCCGTCACCGAGTCCGACGCCCAGTTCGACGCGCGCATGGCGCTCGAGCTCGGCGCGCTGGAGCTGACCATCGGCCGGCTCACCGACGCGCAGCTCGTGGAGTTCCGGATTCTCGCCGAGGCGTCGACCGCGTCGATCGACCACGACCGCTTCACCGATGCGGGCGCGTTCACCGACACCAACGCCGCCTTCCACGAGTTCCTGTTCCGCTGCTGCGGCAACCCGGTGCTGCTCGAGGCGTACAACCGGCTCGAGGTGACGCAGCTGATGCGCAAGGTGCTGCGCACCGCGCAGTGGGTGGACGAGCAGGTTCCGCACGACCACCTGCAGATCGTGCGGGCGTTCGAACGCAAGGACCGCGCGGCGGCCCGCGATCTCATCGTCAGCCATGCCGAGCACGCCAAGGCGACGATGCGTCGCGCCATCGAGGACTCCGCGAAGGCGGAGATCGCGTGA

>*baaD*

GTGGGAAATCTGACCTCGTCGAGCGATCAGGAAACTGCCATGACCCAGCACACCGTCACCGTCGGCACCACCACCGTGCCGTGCGGACCCGATCAGACCGTCCTCGACGCCCTCCTCCGCGGCGGCGTGTGGATGCCCAACTCCTGCAACCAGGGCACGTGCGGCACGTGCAAGATCCGCGTCCGTTCCGGCTCGGTCGAGCACAACGCCTCGCCCGAGGACACCCTGCCGCCGACCGAGCGGGCCGACGGATTCGCCCTGGCCTGCCAGGCGACCGTCGGTGCGGACACCGTCGTCGAACCTCCCGCGGGCGAGCAGACCGCGGCCACGCACGTGCTGCGGGATCTCGTCGCCACGGTGACCGAGGTCCGCGACATCGCACGCGACACCCGGCGCGTCCTGCTCACCCTGGACACACCGCTCGAGTTCTCGGCGGGGCAGTACGTCGAGGTGACGGTGCCCGGCACGGATGTCCGGCGGCAGTACTCCCTCGCGAACCCGCCGAGCGAGCCGAAGCTGCTCGAACTGCACATCCGGCGCCGGCCGGGCGGGGTGGCCAGCGACGGATGGATCTTCGGGACCGTCTCGGTCGGGGACCGGGTCGACGTCACGGGACCGTTCGGCGACTTCACCTTCGACGCCGAGTCGACGGGACCGATGGTTCTGCTCGCGGGCGGGACTGGACTCGCACCGATGAAGAGCATCGTGCGGCACGCACTGGCGCTCGAACCGCACCGGGAGATCACCGTCTACCACGGGGTGCGTACGGCCGAGGACCTGTACGACGTCGCACTGCTGCGGGAATGGGAAGGCCAGTACCCGGGCTTCCGGCTGGTCACGTGCCTGAGTCGCGAGACCGGCGGCGACCGCGAGGGCTACGCGACCGACGCGTTCGTCGAGGATGTGGCGTCGGCGAAGGAGTACACCGGCTACATCTGCGGCTCCGAGGCGTTCGTCGACAGCGCCGTCAAGGCGTTCAAGCGGCGACGGATGTCGCCGCGGCGGATCCACCGGGAGAAGTTCGTCTCGGCGGCGTAG

**Supplement Figure**


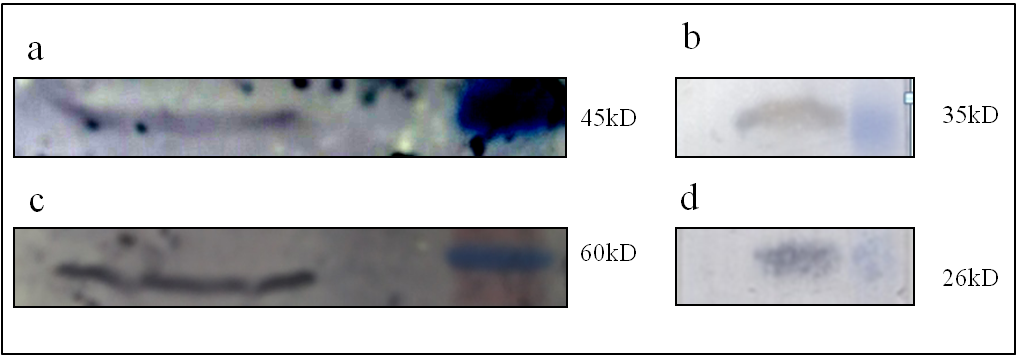


Figure S1. Detection of BaaA (a), BaaB (b), BaaC (c) and BaaD (d) protein in *E. coli* with the BL21-pACYCDuet-1-*baaA-baaD* and pETDuet-1-*baaB-baaC* plasmids by Western Blot. BaaA: 45 KD, BaaB: 37 KD, BaaC: 50 KD, BaaD: 27 KD.

Figure S2. GC/MS characterization of benz[a]anthracene metabolite formed by *Rhodococcus* sp. P14. a) gas chromatogram showing the control sample; b) gas chromatogram showing elution at 36.60 min of benz[a]anthracene-7,12-dione; c) mass spectrum of benz[a]anthracene-7,12-dione.

Abounce

a

RT(min):34.23

b

c

RT(min):36.60

Time(min)

m/z

Abounce

a

RT(min):26.00

b

RT(min):29.04

Time(min)

m/z

c

Figure S3. GC/MS characterization of anthracene metabolite formed by *Rhodococcus* sp. P14. a) gas chromatogram showing the control sample; b) gas chromatogram showing elution at 29.04 min of 9,10-anthracenedione; c) mass spectrum of 9,10-anthracenedione.
